# Supplementary material for: Comparative study of four greenness assessment tools for selection of greenest analytical method for assay of hyoscine N-butyl bromide
Source: Royal Society of Chemistry journal article supplement (doi:10.1039/d0ay02169e), 2020-12-16
Supplement: d0ay02169e1.pdf [file d0ay02169e1.pdf]

**Supplementary file S1: Detailed descriptions of Green analytical procedure index GAPI parameters for analytical methods for HNBB analysis.**

|   | Category*                                                                                                                                                                                                                                                                                                                                                                                                                                                                                                                                                                                                                                                                                                                                                                                                                                           | Figure                                                                               |
|---|-----------------------------------------------------------------------------------------------------------------------------------------------------------------------------------------------------------------------------------------------------------------------------------------------------------------------------------------------------------------------------------------------------------------------------------------------------------------------------------------------------------------------------------------------------------------------------------------------------------------------------------------------------------------------------------------------------------------------------------------------------------------------------------------------------------------------------------------------------|--------------------------------------------------------------------------------------|
| 1 | <p><b>Method [16]</b></p> <p><b><u>Sample preparation</u></b></p> <ol style="list-style-type: none"> <li>1. Offline (Red)</li> <li>2. None (Green)</li> <li>3. Required (Yellow)</li> <li>4. None (Green)</li> <li>5. Simple procedure (yellow)</li> <li>6. Micro-extraction (yellow)</li> <li>7. Non-green solvents and reagents used (Red)</li> <li>8. None (Green)</li> </ol> <p><b><u>Reagent and Solvents</u></b></p> <ol style="list-style-type: none"> <li>9. 10-100 mL (yellow)</li> <li>10. NFPA=2, Moderate toxicity (Yellow)</li> <li>11. NFPA=3; high flammability (Yellow)</li> </ol> <p><b><u>Instrumentation</u></b></p> <ol style="list-style-type: none"> <li>12. ≤1.5 Kwh per sample (yellow)</li> <li>13. Emission of vapors to atmosphere (red)</li> <li>14. &gt;10 mL (Red)</li> <li>15. Recycling possible (Green)</li> </ol> | 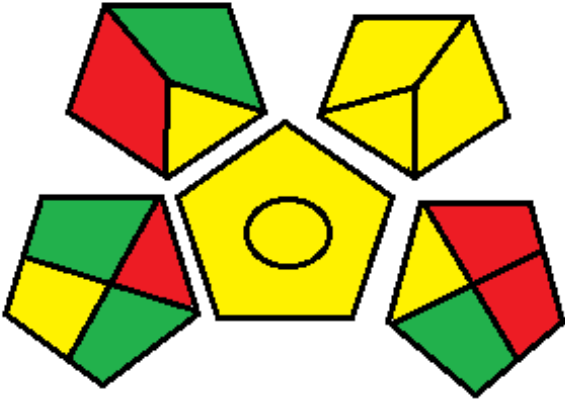   |
| 2 | <p><b>Method [17]</b></p> <p><b><u>Sample preparation</u></b></p> <ol style="list-style-type: none"> <li>1. Offline (Red)</li> <li>2. None (Green)</li> <li>3. Required (Yellow)</li> <li>4. Samples must be iced (yellow)</li> <li>5. Solid-phase extraction (red)</li> <li>6. Nano-extraction (green)</li> <li>7. Non-green solvents and reagents used (Red)</li> </ol>                                                                                                                                                                                                                                                                                                                                                                                                                                                                           |  |

|   |                                                                                                                                                                                                                                                                                                                                                                                                                                                                                                                                                                                                                                                                                   |                                                                                     |
|---|-----------------------------------------------------------------------------------------------------------------------------------------------------------------------------------------------------------------------------------------------------------------------------------------------------------------------------------------------------------------------------------------------------------------------------------------------------------------------------------------------------------------------------------------------------------------------------------------------------------------------------------------------------------------------------------|-------------------------------------------------------------------------------------|
|   | <p>8. Simple treatment (yellow)</p> <p><b><u>Reagent and Solvents</u></b></p> <p>9. 10-100 mL (yellow)</p> <p>10. NFPA=2, Moderate toxicity (Yellow)</p> <p>11. NFPA=3; high flammability (Yellow)</p> <p><b><u>Instrumentation</u></b></p> <p>12. ≤1.5 Kwh per sample (yellow)</p> <p>13. Emission of vapors to atmosphere (red)</p> <p>14. 1- 10 mL (yellow)</p> <p>15. No treatment (Red)</p>                                                                                                                                                                                                                                                                                  |                                                                                     |
| 3 | <p><b>Method [18]</b></p> <p><b><u>Sample preparation</u></b></p> <ol style="list-style-type: none"> <li>Offline (Red)</li> <li>None (green)</li> <li>Required (yellow)</li> <li>Samples must be refrigerated (yellow)</li> <li>Indirect (red)</li> <li>Micro-extraction (yellow)</li> <li>Non-green solvents and reagents used (red)</li> <li>None (green)</li> </ol> <p><b><u>Reagent and Solvents</u></b></p> <p>9. 10-100 mL (yellow)</p> <p>10. NFPA=2, Moderate toxicity (yellow)</p> <p>11. NFPA=3; high flammability (yellow)</p> <p><b><u>Instrumentation</u></b></p> <p>12. ≤1.5 Kwh /sample (yellow)</p> <p>13. Vapors emission (red)</p> <p>14. 10 mL ( red) &gt;</p> | 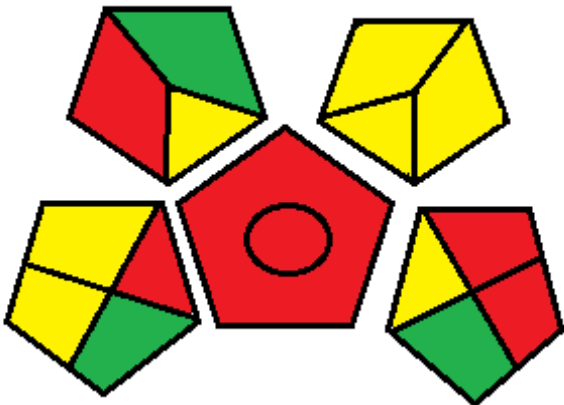 |

|                 |                                                                                                                                                                                                                                                                                                                                                                                                                                                                                                                                                                                                                                                                       |                                                                                      |
|-----------------|-----------------------------------------------------------------------------------------------------------------------------------------------------------------------------------------------------------------------------------------------------------------------------------------------------------------------------------------------------------------------------------------------------------------------------------------------------------------------------------------------------------------------------------------------------------------------------------------------------------------------------------------------------------------------|--------------------------------------------------------------------------------------|
|                 | <p>15. Recycling possible (Green)</p>                                                                                                                                                                                                                                                                                                                                                                                                                                                                                                                                                                                                                                 |                                                                                      |
| <p><b>4</b></p> | <p><b>Method[19]</b><br/> <u>Sample preparation</u><br/> 1. Offline (Red)<br/> 2. None (green)<br/> 3. Required (yellow)<br/> 4. Samples must be refrigerated (yellow)<br/> 5. Simple procedure (yellow)<br/> 6. Micro-extraction (yellow)<br/> 7. Non-green solvents and reagents used (red)<br/> 8. None (green)<br/> <u>Reagent and Solvents</u><br/> 9. 10-100 mL (yellow)<br/> 10. NFPA=2, Moderate toxicity (yellow)<br/> 11. NFPA=3; high flammability (yellow)<br/> <u>Instrumentation</u><br/> 12. <math>\leq 1.5</math> Kwh / sample (yellow)<br/> 13. Vapors emission (red)<br/> 14. <math>&gt; 10</math> mL (red)<br/> 15. Recycling possible (Green)</p> | 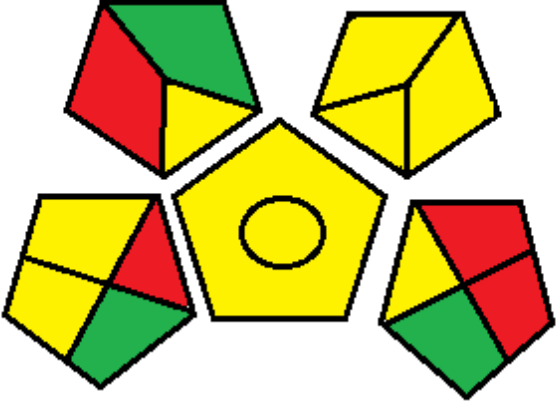   |
| <p><b>5</b></p> | <p><b>Method[20]</b><br/> <u>Sample preparation</u><br/> 1. Offline (Red)<br/> 2. None (green)<br/> 3. Required (yellow)<br/> 4. Samples must be refrigerated (yellow)<br/> 5. Simple procedure (yellow)<br/> 6. Micro-extraction (yellow)<br/> 7. Non-green solvents and</p>                                                                                                                                                                                                                                                                                                                                                                                         |  |

|   |                                                                                                                                                                                                                                                                                                                                                                                                                                                                                                                                                                                                                                                                           |                                                                                     |
|---|---------------------------------------------------------------------------------------------------------------------------------------------------------------------------------------------------------------------------------------------------------------------------------------------------------------------------------------------------------------------------------------------------------------------------------------------------------------------------------------------------------------------------------------------------------------------------------------------------------------------------------------------------------------------------|-------------------------------------------------------------------------------------|
|   | <p>reagents used<br/>(red)</p> <p>8. None (green)</p> <p><b><u>Reagent and Solvents</u></b></p> <p>9. 10-100 mL<br/>(yellow)</p> <p>10. NFPA=2,<br/>Moderate toxicity<br/>(yellow)</p> <p>11. NFPA=3; high<br/>flammability<br/>(yellow)</p> <p><b><u>Instrumentation</u></b></p> <p>12. <math>\leq 1.5</math> Kwh /<br/>sample (yellow)</p> <p>13. Vapors emission<br/>(red)</p> <p>14. 1-10 mL (yellow)</p> <p>15. Recycling<br/>possible (Green)</p>                                                                                                                                                                                                                   |                                                                                     |
| 6 | <p><b><u>Method[21]</u></b></p> <p><b><u>Sample preparation</u></b></p> <p>1. Offline (Red)</p> <p>2. None (green)</p> <p>3. Required (yellow)</p> <p>4. Samples must be<br/>refrigerated<br/>(yellow)</p> <p>5. Simple procedure<br/>(yellow)</p> <p>6. Micro-extraction<br/>(yellow)</p> <p>7. Non-green<br/>solvents and<br/>reagents used<br/>(red)</p> <p>8. None (green)</p> <p><b><u>Reagent and Solvents</u></b></p> <p>9. 10-100 mL<br/>(yellow)</p> <p>10. NFPA=2,<br/>Moderate toxicity<br/>(yellow)</p> <p>11. NFPA=3; high<br/>flammability<br/>(yellow)</p> <p><b><u>Instrumentation</u></b></p> <p>12. <math>\leq 1.5</math> Kwh /<br/>sample (yellow)</p> | 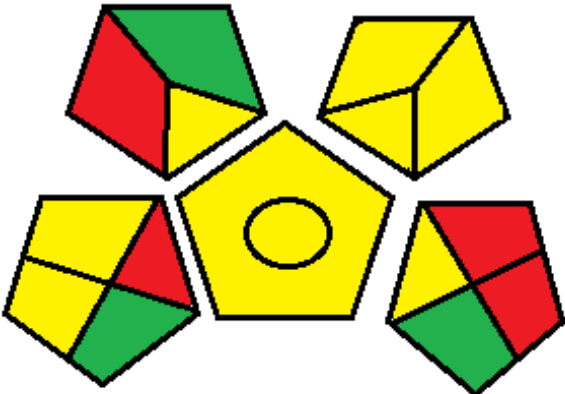 |

|   |                                                                                                                                                                                                                                                                                                                                                                                                                                                                                                                                                                                                                                                                                                                                                                                                                                                             |                                                                                                                                                                                                                                                                                                                                                                                                                                                                                                                                                                                                                                                                               |
|---|-------------------------------------------------------------------------------------------------------------------------------------------------------------------------------------------------------------------------------------------------------------------------------------------------------------------------------------------------------------------------------------------------------------------------------------------------------------------------------------------------------------------------------------------------------------------------------------------------------------------------------------------------------------------------------------------------------------------------------------------------------------------------------------------------------------------------------------------------------------|-------------------------------------------------------------------------------------------------------------------------------------------------------------------------------------------------------------------------------------------------------------------------------------------------------------------------------------------------------------------------------------------------------------------------------------------------------------------------------------------------------------------------------------------------------------------------------------------------------------------------------------------------------------------------------|
|   | <p>13. Vapors emission (red)</p> <p>14. &gt;10 mL ( red)</p> <p>15. Recycling possible (Green)</p>                                                                                                                                                                                                                                                                                                                                                                                                                                                                                                                                                                                                                                                                                                                                                          |                                                                                                                                                                                                                                                                                                                                                                                                                                                                                                                                                                                                                                                                               |
| 7 | <p><b>Method [22]</b></p> <p><b><u>Sample preparation</u></b></p> <ol style="list-style-type: none"> <li>1. Offline (Red)</li> <li>2. None (green)</li> <li>3. Required (yellow)</li> <li>4. Samples must be refrigerated (yellow)</li> <li>5. Simple procedure (yellow)</li> <li>6. Micro-extraction (yellow)</li> <li>7. Non-green solvents and reagents used (red)</li> <li>8. None (green)</li> </ol> <p><b><u>Reagent and Solvents</u></b></p> <ol style="list-style-type: none"> <li>9. 10-100 mL (yellow)</li> <li>10. NFPA=2, Moderate toxicity (yellow)</li> <li>11. NFPA=3; high flammability (yellow)</li> </ol> <p><b><u>Instrumentation</u></b></p> <ol style="list-style-type: none"> <li>12. ≤1.5 Kwh / sample (yellow)</li> <li>13. Vapors emission (red)</li> <li>14. 1- 10 mL (yellow)</li> <li>15. Recycling possible (Green)</li> </ol> | 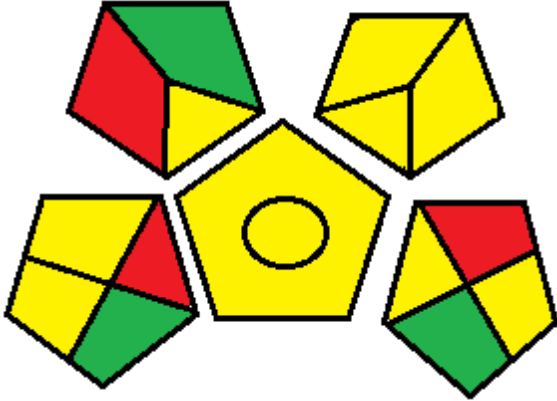 <p>The image shows a cluster of five pentagons. In the center is a yellow pentagon with a black circle inside. Surrounding it are four other pentagons, each with three colored faces: red, green, and yellow. The top-left pentagon has red on the left, green on the top, and yellow on the right. The top-right pentagon has yellow on the top, red on the right, and green on the bottom. The bottom-left pentagon has yellow on the left, green on the bottom, and red on the right. The bottom-right pentagon has yellow on the right, green on the bottom, and red on the left.</p> |

|          |                                                                                                                                                                                                                                                                                                                                                                                                                                                                                                                                                                                                                                                                                 |                                                                                      |
|----------|---------------------------------------------------------------------------------------------------------------------------------------------------------------------------------------------------------------------------------------------------------------------------------------------------------------------------------------------------------------------------------------------------------------------------------------------------------------------------------------------------------------------------------------------------------------------------------------------------------------------------------------------------------------------------------|--------------------------------------------------------------------------------------|
| <p>8</p> | <p><b>Method[23]</b><br/> <u><b>Sample preparation</b></u><br/> 1. Offline (Red)<br/> 2. None (green)<br/> 3. Required (yellow)<br/> 4. Samples must be refrigerated (yellow)<br/> 5. Simple procedure (yellow)<br/> 6. Micro-extraction (yellow)<br/> 7. Non-green solvents and reagents used (red)<br/> 8. None (green)<br/> <u><b>Reagent and Solvents</b></u><br/> 9. 10-100 mL (yellow)<br/> 10. NFPA=2, Moderate toxicity (yellow)<br/> 11. NFPA=3; high flammability (yellow)<br/> <u><b>Instrumentation</b></u><br/> 12. <math>\leq 1.5</math> Kwh per sample (yellow)<br/> 13. Vapors emission (red)<br/> 14. 1-10 mL (yellow)<br/> 15. Recycling possible (Green)</p> | 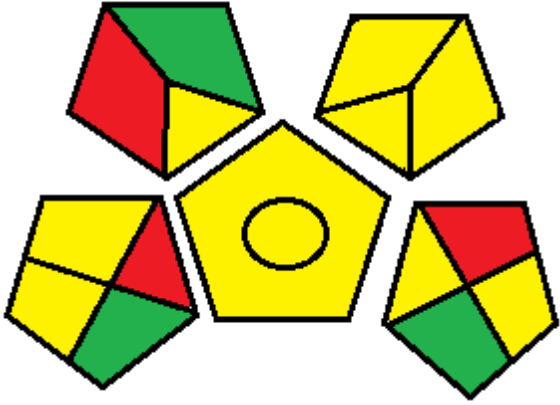   |
| <p>9</p> | <p><b>Method[24]</b><br/> <u><b>Sample preparation</b></u><br/> 1. Offline (Red)<br/> 2. None (green)<br/> 3. Required (yellow)<br/> 4. Samples must be refrigerated (yellow)<br/> 5. Simple procedure (yellow)<br/> 6. Micro-extraction (yellow)<br/> 7. Non-green solvents and reagents used (red)</p>                                                                                                                                                                                                                                                                                                                                                                        |  |

|    |                                                                                                                                                                                                                                                                                                                                                                                                                                                                                                                                                                                                                                                             |                                                                                     |
|----|-------------------------------------------------------------------------------------------------------------------------------------------------------------------------------------------------------------------------------------------------------------------------------------------------------------------------------------------------------------------------------------------------------------------------------------------------------------------------------------------------------------------------------------------------------------------------------------------------------------------------------------------------------------|-------------------------------------------------------------------------------------|
|    | <p>8. None (green)</p> <p><b><u>Reagent and Solvents</u></b></p> <p>9. 10-100 mL (yellow)</p> <p>10. NFPA=2, Moderate toxicity (yellow)</p> <p>11. NFPA=3; high flammability (yellow)</p> <p><b><u>Instrumentation</u></b></p> <p>12. <math>\leq 1.5</math> Kwh / sample (yellow)</p> <p>13. Vapors emission (red)</p> <p>14. 1 -10 mL (yellow)</p> <p>15. Recycling possible (Green)</p>                                                                                                                                                                                                                                                                   |                                                                                     |
| 10 | <p><b>Method [25]</b></p> <p><b><u>Sample preparation</u></b></p> <p>1. Offline (Red)</p> <p>2. None (green)</p> <p>3. Required (yellow)</p> <p>4. Samples must be refrigerated (yellow)</p> <p>5. Simple procedure (yellow)</p> <p>6. Nano-extraction (green)</p> <p>7. Non-green solvents and reagents used (red)</p> <p>8. None (green)</p> <p><b><u>Reagent and Solvents</u></b></p> <p>9. 10-100 mL (yellow)</p> <p>10. NFPA=2, Moderate toxicity (yellow)</p> <p>11. NFPA=3; high flammability (yellow)</p> <p><b><u>Instrumentation</u></b></p> <p>12. <math>\geq 1.5</math> Kwh /sample (Red)</p> <p>13. Emission of vapors to atmosphere (red)</p> | 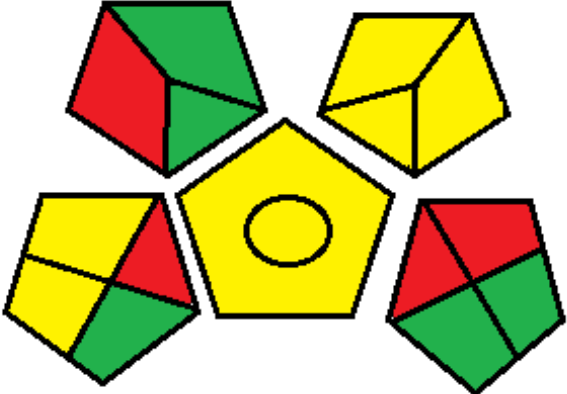 |

|    |                                                                                                                                                                                                                                                                                                                                                                                                                                                                                                                                                                                                                                                         |                                                                                     |
|----|---------------------------------------------------------------------------------------------------------------------------------------------------------------------------------------------------------------------------------------------------------------------------------------------------------------------------------------------------------------------------------------------------------------------------------------------------------------------------------------------------------------------------------------------------------------------------------------------------------------------------------------------------------|-------------------------------------------------------------------------------------|
|    | <p>14. &lt;math&gt;\leq 1\text{ mL}&lt;/math&gt; (green)<br/> 15. Recycling possible (Green)</p>                                                                                                                                                                                                                                                                                                                                                                                                                                                                                                                                                        |                                                                                     |
| 11 | <p><b>Method [26]</b><br/> <u>Sample preparation</u><br/> 1. Offline (Red)<br/> 2. None (yellow)<br/> 3. Required (yellow)<br/> 4. Under normal conditions (yellow)<br/> 5. Complicated sample collection (red)<br/> 6. Nano-extraction (green)<br/> 7. Non-green solvents and reagents used (red)<br/> 8. None (green)<br/> <u>Reagent and Solvents</u><br/> 9. 10-100 mL (yellow)<br/> 10. NFPA=2, Moderate toxicity (yellow)<br/> 11. NFPA=3; high flammability (yellow)<br/> <u>Instrumentation</u><br/> 12. <math>\geq 1.5</math> Kwh / sample (Red)<br/> 13. Vapors emission (red)<br/> 14. &lt;math&gt;\leq 1\text{ mL}&lt;/math&gt; (green)</p> | 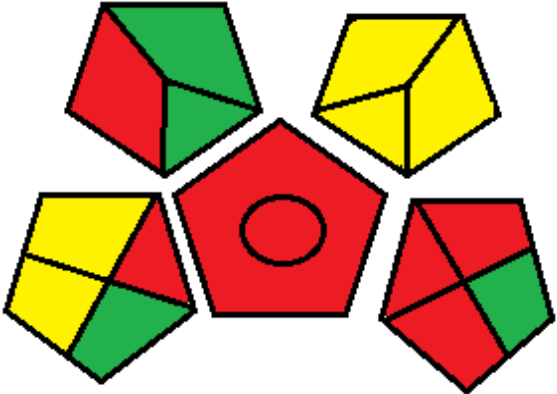 |



|    |                                                                                                                                                                                                                                                                                                                                                                                                                                                                                                                                                                                                                                                                                                                                                                                                                                                                                                                                                                                                                                                                                                                                                                                                                                         |                                                                                     |
|----|-----------------------------------------------------------------------------------------------------------------------------------------------------------------------------------------------------------------------------------------------------------------------------------------------------------------------------------------------------------------------------------------------------------------------------------------------------------------------------------------------------------------------------------------------------------------------------------------------------------------------------------------------------------------------------------------------------------------------------------------------------------------------------------------------------------------------------------------------------------------------------------------------------------------------------------------------------------------------------------------------------------------------------------------------------------------------------------------------------------------------------------------------------------------------------------------------------------------------------------------|-------------------------------------------------------------------------------------|
|    | <p>15. No treatment (Red)</p>                                                                                                                                                                                                                                                                                                                                                                                                                                                                                                                                                                                                                                                                                                                                                                                                                                                                                                                                                                                                                                                                                                                                                                                                           |                                                                                     |
| 12 | <p><b>Method [27]</b> Aqueous method</p> <p><b>Sample preparation</b></p> <ol style="list-style-type: none"> <li>1. Offline (Red)</li> <li>2. None (green)</li> <li>3. Required (yellow)</li> <li>4. Under normal conditions (yellow)</li> <li>5. simple sample collection (yellow)</li> <li>6. micro-extraction (yellow)</li> <li>7. Green solvent (yellow)</li> <li>8. None (green)</li> </ol> <p><b>Reagent and Solvents</b></p> <ol style="list-style-type: none"> <li>9. &gt;10 mL (green)</li> <li>10. NFPA health hazard=1 (green)</li> <li>11. NFPA flammability score=0 (green)</li> <li>12. <math>\geq 1.5</math> Kwh / sample (Red)</li> </ol> <p><b>Instrumentation</b></p> <ol style="list-style-type: none"> <li>13. Hermetic sealing of analytical process (green)</li> <li>14. mL (green) &lt; 1</li> <li>15. Recycling possible (green)</li> </ol> <p><b>Non-aqueous method[27]</b></p> <p><b>Sample preparation</b></p> <ol style="list-style-type: none"> <li>1. Offline (Red)</li> <li>2. None (green)</li> <li>3. Required (yellow)</li> <li>4. Under normal conditions (yellow)</li> <li>5. simple sample collection (yellow)</li> <li>6. Micro-extraction (yellow)</li> <li>7. Non-green solvents and</li> </ol> | 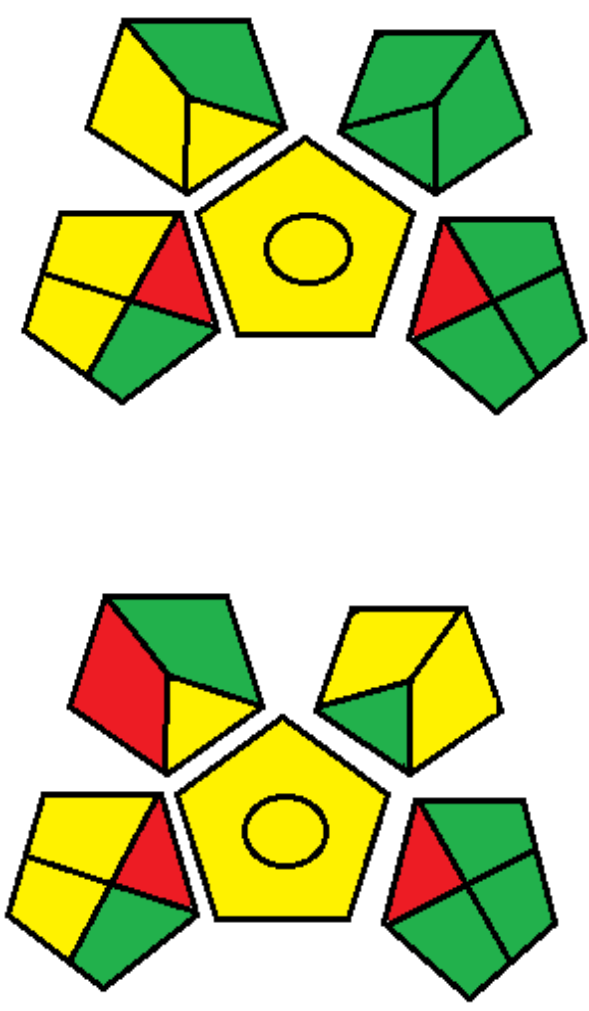 |

|    |                                                                                                                                                                                                                                                                                                                                                                                                                                                                                                                                                                                                                                     |                                                                                     |
|----|-------------------------------------------------------------------------------------------------------------------------------------------------------------------------------------------------------------------------------------------------------------------------------------------------------------------------------------------------------------------------------------------------------------------------------------------------------------------------------------------------------------------------------------------------------------------------------------------------------------------------------------|-------------------------------------------------------------------------------------|
|    | <p>reagents used (red)</p> <p>8. None (green)</p> <p><b><u>Reagent and Solvents</u></b></p> <p>9. &gt;10 mL (green)</p> <p>10. NFPA=2, Moderate toxicity (yellow)</p> <p>11. NFPA=3; high flammability (yellow)</p> <p><b><u>Instrumentation</u></b></p> <p>12. <math>\geq 1.5</math> Kwh / sample (Red)</p> <p>13. Hermetic sealing of analytical process (green)</p> <p>14. &lt; 1 mL (green)</p> <p>15. Recycling is possible (green)</p>                                                                                                                                                                                        |                                                                                     |
| 13 | <p><b>Method [28]</b> Non-aqueous method</p> <p><b><u>Sample preparation</u></b></p> <p>1. Offline (Red)</p> <p>2. None (green)</p> <p>3. Required (yellow)</p> <p>4. Under normal conditions (yellow)</p> <p>5. simple sample collection (yellow)</p> <p>6. Micro-extraction (yellow)</p> <p>7. Non-green solvents and reagents used (red)</p> <p>8. None (green)</p> <p><b><u>Reagent and Solvents</u></b></p> <p>9. &gt;10 mL (green)</p> <p>10. NFPA=2, Moderate toxicity (yellow)</p> <p>11. NFPA=3; high flammability (yellow)</p> <p><b><u>Instrumentation</u></b></p> <p>12. <math>\geq 1.5</math> Kwh per sample (Red)</p> | 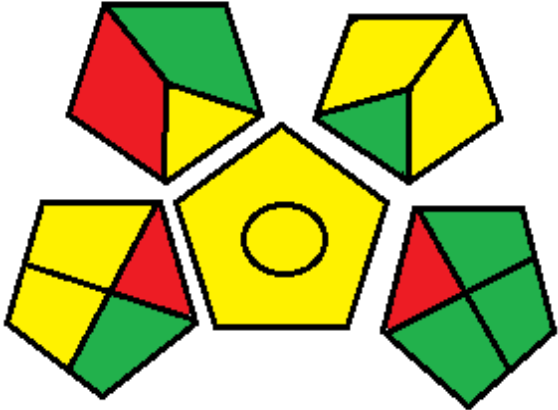 |

|    |                                                                                                                                                                                                                                                                                                                                                                                                                                                                                                                                                                                                                                                                                                                                                                                                                                                              |                                                                                    |
|----|--------------------------------------------------------------------------------------------------------------------------------------------------------------------------------------------------------------------------------------------------------------------------------------------------------------------------------------------------------------------------------------------------------------------------------------------------------------------------------------------------------------------------------------------------------------------------------------------------------------------------------------------------------------------------------------------------------------------------------------------------------------------------------------------------------------------------------------------------------------|------------------------------------------------------------------------------------|
|    | <p>13. Hermetic sealing of analytical process (green)</p> <p>14. &lt; 1 mL (green)</p> <p>15. Recycling is possible (green)</p>                                                                                                                                                                                                                                                                                                                                                                                                                                                                                                                                                                                                                                                                                                                              |                                                                                    |
| 14 | <p><b>Method [29]</b></p> <p><b><u>Sample preparation</u></b></p> <ol style="list-style-type: none"> <li>1. Offline (Red)</li> <li>2. None (green)</li> <li>3. Required (yellow)</li> <li>4. Samples must be refrigerated (yellow)</li> <li>5. Simple procedure (yellow)</li> <li>6. Micro-extraction (yellow)</li> <li>7. Non-green solvents and reagents used (red)</li> <li>8. None (green)</li> </ol> <p><b><u>Reagent and Solvents</u></b></p> <ol style="list-style-type: none"> <li>9. 10-100 mL (yellow)</li> <li>10. NFPA=2, Moderate toxicity (yellow)</li> <li>11. NFPA=3; high flammability (yellow)</li> </ol> <p><b><u>Instrumentation</u></b></p> <ol style="list-style-type: none"> <li>12. ≤1.5 Kwh / sample (yellow)</li> <li>13. Vapors emission (red)</li> <li>14. 1 - 10 mL (yellow)</li> <li>15. Recycling possible (Green)</li> </ol> | 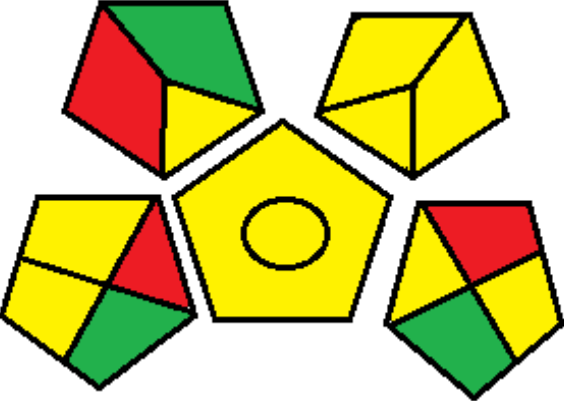 |

|    |                                                                                                                                                                                                                                                                                                                                                                                                                                                                                                                                                                                                                                                                                                                                                                                                                                                                                          |                                                                                      |
|----|------------------------------------------------------------------------------------------------------------------------------------------------------------------------------------------------------------------------------------------------------------------------------------------------------------------------------------------------------------------------------------------------------------------------------------------------------------------------------------------------------------------------------------------------------------------------------------------------------------------------------------------------------------------------------------------------------------------------------------------------------------------------------------------------------------------------------------------------------------------------------------------|--------------------------------------------------------------------------------------|
| 15 | <p><b>Method [30]</b></p> <p><b><u>Sample preparation</u></b></p> <ol style="list-style-type: none"> <li>1. Offline (Red)</li> <li>2. None (green)</li> <li>3. Required (yellow)</li> <li>4. Samples must be refrigerated (yellow)</li> <li>5. Simple procedure (yellow)</li> <li>6. Micro-extraction (yellow)</li> <li>7. Non-green solvents and reagents used (red)</li> <li>8. None (green)</li> </ol> <p><b><u>Reagent and Solvents</u></b></p> <ol style="list-style-type: none"> <li>9. 10-100 mL (yellow)</li> <li>10. NFPA=2, Moderate toxicity (yellow)</li> <li>11. NFPA=3; high flammability (yellow)</li> </ol> <p><b><u>Instrumentation</u></b></p> <ol style="list-style-type: none"> <li>12. <math>\leq 1.5</math> Kwh / sample (yellow)</li> <li>13. Vapors emission (red)</li> <li>14. <math>&gt; 10</math> mL (red)</li> <li>15. Recycling possible (Green)</li> </ol> | 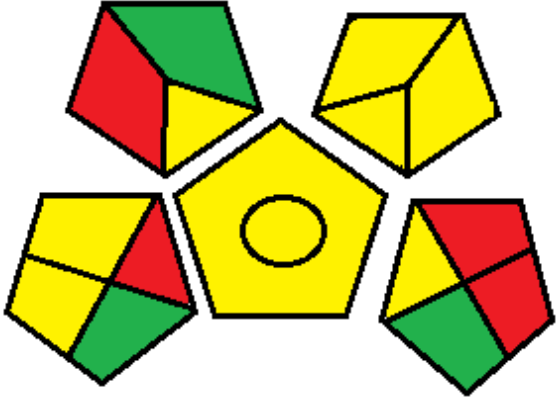   |
| 16 | <p><b>Method [31]</b></p> <p><b><u>Sample preparation</u></b></p> <ol style="list-style-type: none"> <li>1. Offline (Red)</li> <li>2. None (green)</li> <li>3. Required (yellow)</li> <li>4. Samples must be refrigerated (yellow)</li> <li>5. Simple procedure (yellow)</li> <li>6. Micro-extraction (yellow)</li> <li>7. Non-green solvents and reagents used (red)</li> </ol>                                                                                                                                                                                                                                                                                                                                                                                                                                                                                                         |  |

|  |                                                                                                                                                                                   |  |
|--|-----------------------------------------------------------------------------------------------------------------------------------------------------------------------------------|--|
|  | 8. None (green)<br><u><b>Reagent and Solvents</b></u><br>9. 10-100 mL<br>(yellow)<br>10. NFPA=2,<br>Moderate toxicity<br>(yellow)<br>11. NFPA=3; high<br>flammability<br>(yellow) |  |
|  | <u><b>Instrumentation</b></u><br>12. $\geq 1.5$ Kwh /sample<br>(Red)<br>13. Vapors emission<br>(red)<br>14. 1- 10 mL (yellow)<br>15. Recycling<br>possible (Green)                |  |

\*1-Collection, 2-Preservation, 3-Transport, 4-Storage, 5-Type of method: Direct or indirect, 6-Scale of extraction, 7-Solvents/ reagents used, 8-Additional treatments, 9-Amount, 10-Health hazard, 11-Safety hazard, 12-Energy, 13-Occupational hazard, 14-Waste, 15-Waste treatment
