# Supplementary material for: Comparative study of four greenness assessment tools for selection of greenest analytical method for assay of hyoscine N-butyl bromide
Source: Royal Society of Chemistry journal article supplement (doi:10.1039/d0ay02169e), 2020-12-16
Supplement: d0ay02169e2.pdf [file d0ay02169e2.pdf]

## Analytical Greenness report sheet

19/11/2020 14:38:04

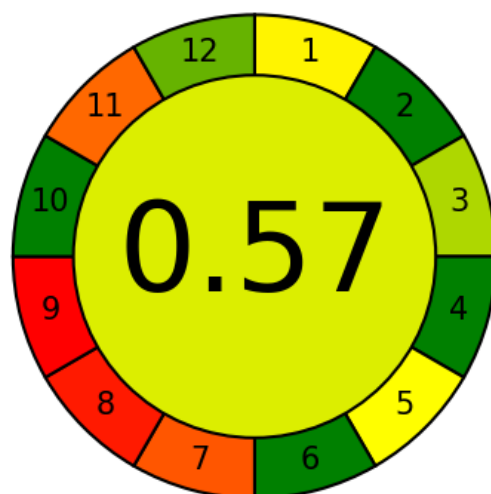

| Criteria                                                                                                                             | Score | Weight |
|--------------------------------------------------------------------------------------------------------------------------------------|-------|--------|
| 1. Direct analytical techniques should be applied to avoid sample treatment.                                                         | 0.48  | 2      |
| 2. Minimal sample size and minimal number of samples are goals.                                                                      | 1.0   | 2      |
| 3. If possible, measurements should be performed in situ.                                                                            | 0.66  | 2      |
| 4. Integration of analytical processes and operations saves energy and reduces the use of reagents.                                  | 1.0   | 2      |
| 5. Automated and miniaturized methods should be selected.                                                                            | 0.5   | 2      |
| 6. Derivatization should be avoided.                                                                                                 | 1.0   | 2      |
| 7. Generation of a large volume of analytical waste should be avoided, and proper management of analytical waste should be provided. | 0.17  | 2      |
| 8. Multi-analyte or multi-parameter methods are preferred versus methods using one analyte at a time.                                | 0.05  | 2      |
| 9. The use of energy should be minimized.                                                                                            | 0.0   | 2      |
| 10. Reagents obtained from renewable sources should be preferred.                                                                    | 1.0   | 2      |
| 11. Toxic reagents should be eliminated or replaced.                                                                                 | 0.2   | 2      |
| 12. Operator's safety should be increased.                                                                                           | 0.8   | 2      |

# Analytical Greenness report sheet

20/11/2020 12:30:19

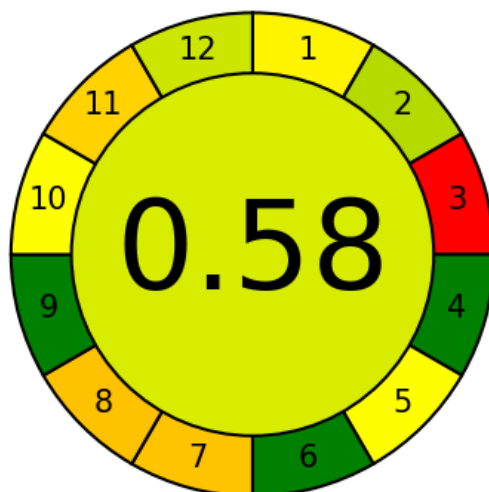

| Criteria                                                                                                                             | Score | Weight |
|--------------------------------------------------------------------------------------------------------------------------------------|-------|--------|
| 1. Direct analytical techniques should be applied to avoid sample treatment.                                                         | 0.48  | 2      |
| 2. Minimal sample size and minimal number of samples are goals.                                                                      | 0.65  | 2      |
| 3. If possible, measurements should be performed in situ.                                                                            | 0.0   | 2      |
| 4. Integration of analytical processes and operations saves energy and reduces the use of reagents.                                  | 1.0   | 2      |
| 5. Automated and miniaturized methods should be selected.                                                                            | 0.5   | 2      |
| 6. Derivatization should be avoided.                                                                                                 | 1.0   | 2      |
| 7. Generation of a large volume of analytical waste should be avoided, and proper management of analytical waste should be provided. | 0.39  | 2      |
| 8. Multi-analyte or multi-parameter methods are preferred versus methods using one analyte at a time.                                | 0.38  | 2      |
| 9. The use of energy should be minimized.                                                                                            | 1.0   | 2      |
| 10. Reagents obtained from renewable sources should be preferred.                                                                    | 0.5   | 2      |
| 11. Toxic reagents should be eliminated or replaced.                                                                                 | 0.41  | 2      |
| 12. Operator's safety should be increased.                                                                                           | 0.6   | 2      |

# Analytical Greenness report sheet

20/11/2020 12:37:41

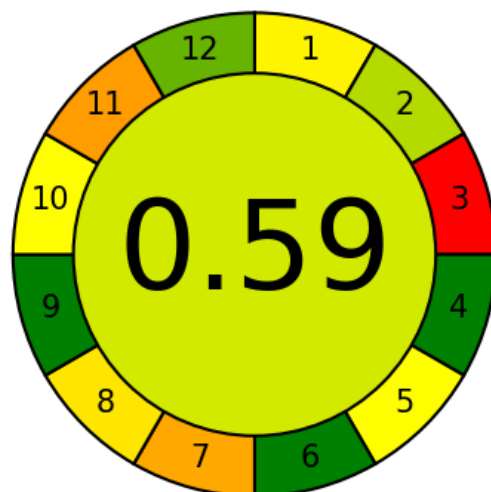

| Criteria                                                                                                                             | Score | Weight |
|--------------------------------------------------------------------------------------------------------------------------------------|-------|--------|
| 1. Direct analytical techniques should be applied to avoid sample treatment.                                                         | 0.48  | 2      |
| 2. Minimal sample size and minimal number of samples are goals.                                                                      | 0.65  | 2      |
| 3. If possible, measurements should be performed in situ.                                                                            | 0.0   | 2      |
| 4. Integration of analytical processes and operations saves energy and reduces the use of reagents.                                  | 1.0   | 2      |
| 5. Automated and miniaturized methods should be selected.                                                                            | 0.5   | 2      |
| 6. Derivatization should be avoided.                                                                                                 | 1.0   | 2      |
| 7. Generation of a large volume of analytical waste should be avoided, and proper management of analytical waste should be provided. | 0.33  | 2      |
| 8. Multi-analyte or multi-parameter methods are preferred versus methods using one analyte at a time.                                | 0.45  | 2      |
| 9. The use of energy should be minimized.                                                                                            | 1.0   | 2      |
| 10. Reagents obtained from renewable sources should be preferred.                                                                    | 0.5   | 2      |
| 11. Toxic reagents should be eliminated or replaced.                                                                                 | 0.31  | 2      |
| 12. Operator's safety should be increased.                                                                                           | 0.8   | 2      |

# Analytical Greenness report sheet

20/11/2020 12:40:51

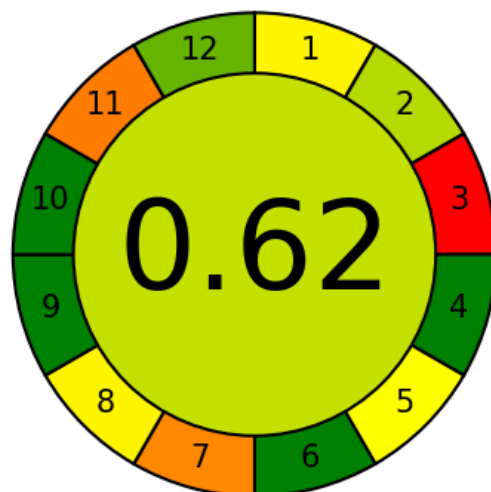

| Criteria                                                                                                                             | Score | Weight |
|--------------------------------------------------------------------------------------------------------------------------------------|-------|--------|
| 1. Direct analytical techniques should be applied to avoid sample treatment.                                                         | 0.48  | 2      |
| 2. Minimal sample size and minimal number of samples are goals.                                                                      | 0.65  | 2      |
| 3. If possible, measurements should be performed in situ.                                                                            | 0.0   | 2      |
| 4. Integration of analytical processes and operations saves energy and reduces the use of reagents.                                  | 1.0   | 2      |
| 5. Automated and miniaturized methods should be selected.                                                                            | 0.5   | 2      |
| 6. Derivatization should be avoided.                                                                                                 | 1.0   | 2      |
| 7. Generation of a large volume of analytical waste should be avoided, and proper management of analytical waste should be provided. | 0.27  | 2      |
| 8. Multi-analyte or multi-parameter methods are preferred versus methods using one analyte at a time.                                | 0.48  | 2      |
| 9. The use of energy should be minimized.                                                                                            | 1.0   | 2      |
| 10. Reagents obtained from renewable sources should be preferred.                                                                    | 1.0   | 2      |
| 11. Toxic reagents should be eliminated or replaced.                                                                                 | 0.25  | 2      |
| 12. Operator's safety should be increased.                                                                                           | 0.8   | 2      |

# Analytical Greenness report sheet

20/11/2020 12:44:43

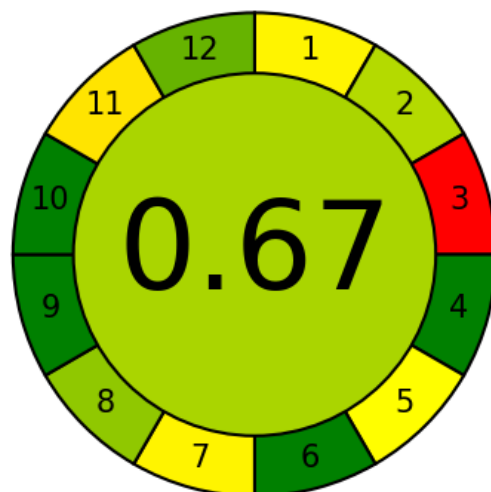

| Criteria                                                                                                                             | Score | Weight |
|--------------------------------------------------------------------------------------------------------------------------------------|-------|--------|
| 1. Direct analytical techniques should be applied to avoid sample treatment.                                                         | 0.48  | 2      |
| 2. Minimal sample size and minimal number of samples are goals.                                                                      | 0.65  | 2      |
| 3. If possible, measurements should be performed in situ.                                                                            | 0.0   | 2      |
| 4. Integration of analytical processes and operations saves energy and reduces the use of reagents.                                  | 1.0   | 2      |
| 5. Automated and miniaturized methods should be selected.                                                                            | 0.5   | 2      |
| 6. Derivatization should be avoided.                                                                                                 | 1.0   | 2      |
| 7. Generation of a large volume of analytical waste should be avoided, and proper management of analytical waste should be provided. | 0.48  | 2      |
| 8. Multi-analyte or multi-parameter methods are preferred versus methods using one analyte at a time.                                | 0.72  | 2      |
| 9. The use of energy should be minimized.                                                                                            | 1.0   | 2      |
| 10. Reagents obtained from renewable sources should be preferred.                                                                    | 1.0   | 2      |
| 11. Toxic reagents should be eliminated or replaced.                                                                                 | 0.45  | 2      |
| 12. Operator's safety should be increased.                                                                                           | 0.8   | 2      |

# Analytical Greenness report sheet

20/11/2020 12:48:24

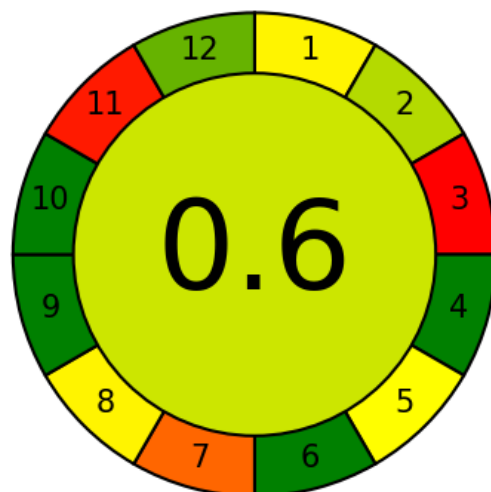

| Criteria                                                                                                                             | Score | Weight |
|--------------------------------------------------------------------------------------------------------------------------------------|-------|--------|
| 1. Direct analytical techniques should be applied to avoid sample treatment.                                                         | 0.48  | 2      |
| 2. Minimal sample size and minimal number of samples are goals.                                                                      | 0.65  | 2      |
| 3. If possible, measurements should be performed in situ.                                                                            | 0.0   | 2      |
| 4. Integration of analytical processes and operations saves energy and reduces the use of reagents.                                  | 1.0   | 2      |
| 5. Automated and miniaturized methods should be selected.                                                                            | 0.5   | 2      |
| 6. Derivatization should be avoided.                                                                                                 | 1.0   | 2      |
| 7. Generation of a large volume of analytical waste should be avoided, and proper management of analytical waste should be provided. | 0.2   | 2      |
| 8. Multi-analyte or multi-parameter methods are preferred versus methods using one analyte at a time.                                | 0.48  | 2      |
| 9. The use of energy should be minimized.                                                                                            | 1.0   | 2      |
| 10. Reagents obtained from renewable sources should be preferred.                                                                    | 1.0   | 2      |
| 11. Toxic reagents should be eliminated or replaced.                                                                                 | 0.05  | 2      |
| 12. Operator's safety should be increased.                                                                                           | 0.8   | 2      |

# Analytical Greenness report sheet

20/11/2020 12:53:23

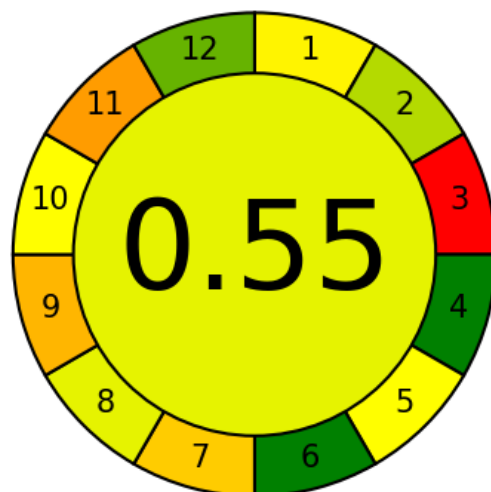

| Criteria                                                                                                                             | Score | Weight |
|--------------------------------------------------------------------------------------------------------------------------------------|-------|--------|
| 1. Direct analytical techniques should be applied to avoid sample treatment.                                                         | 0.48  | 2      |
| 2. Minimal sample size and minimal number of samples are goals.                                                                      | 0.65  | 2      |
| 3. If possible, measurements should be performed in situ.                                                                            | 0.0   | 2      |
| 4. Integration of analytical processes and operations saves energy and reduces the use of reagents.                                  | 1.0   | 2      |
| 5. Automated and miniaturized methods should be selected.                                                                            | 0.5   | 2      |
| 6. Derivatization should be avoided.                                                                                                 | 1.0   | 2      |
| 7. Generation of a large volume of analytical waste should be avoided, and proper management of analytical waste should be provided. | 0.4   | 2      |
| 8. Multi-analyte or multi-parameter methods are preferred versus methods using one analyte at a time.                                | 0.55  | 2      |
| 9. The use of energy should be minimized.                                                                                            | 0.36  | 2      |
| 10. Reagents obtained from renewable sources should be preferred.                                                                    | 0.5   | 2      |
| 11. Toxic reagents should be eliminated or replaced.                                                                                 | 0.31  | 2      |
| 12. Operator's safety should be increased.                                                                                           | 0.8   | 2      |

# Analytical Greenness report sheet

20/11/2020 12:56:13

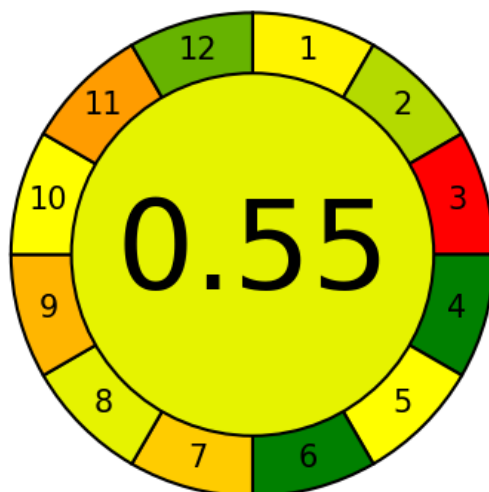

| Criteria                                                                                                                             | Score | Weight |
|--------------------------------------------------------------------------------------------------------------------------------------|-------|--------|
| 1. Direct analytical techniques should be applied to avoid sample treatment.                                                         | 0.48  | 2      |
| 2. Minimal sample size and minimal number of samples are goals.                                                                      | 0.65  | 2      |
| 3. If possible, measurements should be performed in situ.                                                                            | 0.0   | 2      |
| 4. Integration of analytical processes and operations saves energy and reduces the use of reagents.                                  | 1.0   | 2      |
| 5. Automated and miniaturized methods should be selected.                                                                            | 0.5   | 2      |
| 6. Derivatization should be avoided.                                                                                                 | 1.0   | 2      |
| 7. Generation of a large volume of analytical waste should be avoided, and proper management of analytical waste should be provided. | 0.4   | 2      |
| 8. Multi-analyte or multi-parameter methods are preferred versus methods using one analyte at a time.                                | 0.55  | 2      |
| 9. The use of energy should be minimized.                                                                                            | 0.36  | 2      |
| 10. Reagents obtained from renewable sources should be preferred.                                                                    | 0.5   | 2      |
| 11. Toxic reagents should be eliminated or replaced.                                                                                 | 0.31  | 2      |
| 12. Operator's safety should be increased.                                                                                           | 0.8   | 2      |



# Analytical Greenness report sheet

20/11/2020 12:59:36

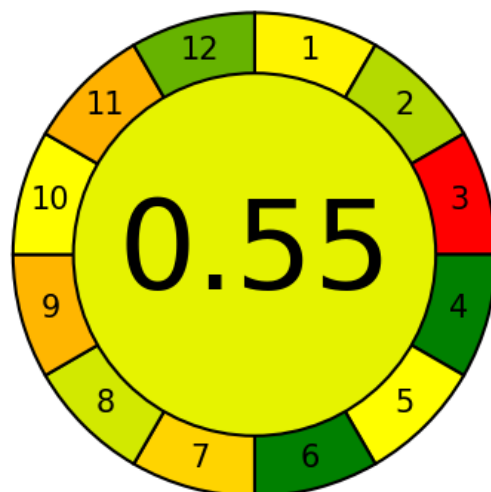

| Criteria                                                                                                                             | Score | Weight |
|--------------------------------------------------------------------------------------------------------------------------------------|-------|--------|
| 1. Direct analytical techniques should be applied to avoid sample treatment.                                                         | 0.48  | 2      |
| 2. Minimal sample size and minimal number of samples are goals.                                                                      | 0.65  | 2      |
| 3. If possible, measurements should be performed in situ.                                                                            | 0.0   | 2      |
| 4. Integration of analytical processes and operations saves energy and reduces the use of reagents.                                  | 1.0   | 2      |
| 5. Automated and miniaturized methods should be selected.                                                                            | 0.5   | 2      |
| 6. Derivatization should be avoided.                                                                                                 | 1.0   | 2      |
| 7. Generation of a large volume of analytical waste should be avoided, and proper management of analytical waste should be provided. | 0.42  | 2      |
| 8. Multi-analyte or multi-parameter methods are preferred versus methods using one analyte at a time.                                | 0.59  | 2      |
| 9. The use of energy should be minimized.                                                                                            | 0.36  | 2      |
| 10. Reagents obtained from renewable sources should be preferred.                                                                    | 0.5   | 2      |
| 11. Toxic reagents should be eliminated or replaced.                                                                                 | 0.35  | 2      |
| 12. Operator's safety should be increased.                                                                                           | 0.8   | 2      |

# Analytical Greenness report sheet

21/11/2020 19:34:22

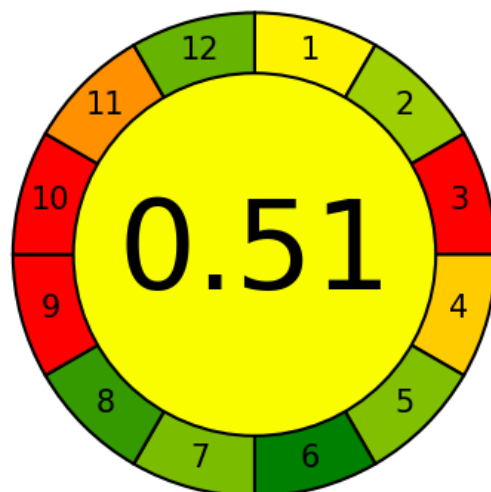

| Criteria                                                                                                                             | Score | Weight |
|--------------------------------------------------------------------------------------------------------------------------------------|-------|--------|
| 1. Direct analytical techniques should be applied to avoid sample treatment.                                                         | 0.48  | 2      |
| 2. Minimal sample size and minimal number of samples are goals.                                                                      | 0.69  | 2      |
| 3. If possible, measurements should be performed in situ.                                                                            | 0.0   | 2      |
| 4. Integration of analytical processes and operations saves energy and reduces the use of reagents.                                  | 0.4   | 2      |
| 5. Automated and miniaturized methods should be selected.                                                                            | 0.75  | 2      |
| 6. Derivatization should be avoided.                                                                                                 | 1.0   | 2      |
| 7. Generation of a large volume of analytical waste should be avoided, and proper management of analytical waste should be provided. | 0.76  | 2      |
| 8. Multi-analyte or multi-parameter methods are preferred versus methods using one analyte at a time.                                | 0.9   | 2      |
| 9. The use of energy should be minimized.                                                                                            | 0.0   | 2      |
| 10. Reagents obtained from renewable sources should be preferred.                                                                    | 0.0   | 2      |
| 11. Toxic reagents should be eliminated or replaced.                                                                                 | 0.28  | 2      |
| 12. Operator's safety should be increased.                                                                                           | 0.8   | 2      |

# Analytical Greenness report sheet

21/11/2020 13:28:13

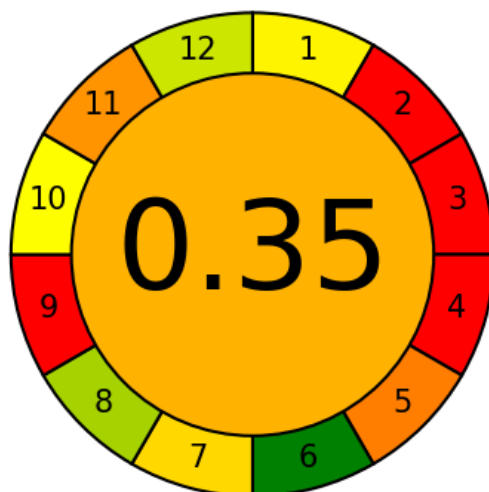

| Criteria                                                                                                                             | Score | Weight |
|--------------------------------------------------------------------------------------------------------------------------------------|-------|--------|
| 1. Direct analytical techniques should be applied to avoid sample treatment.                                                         | 0.48  | 2      |
| 2. Minimal sample size and minimal number of samples are goals.                                                                      | 0     | 2      |
| 3. If possible, measurements should be performed in situ.                                                                            | 0.0   | 2      |
| 4. Integration of analytical processes and operations saves energy and reduces the use of reagents.                                  | 0.0   | 2      |
| 5. Automated and miniaturized methods should be selected.                                                                            | 0.25  | 2      |
| 6. Derivatization should be avoided.                                                                                                 | 1.0   | 2      |
| 7. Generation of a large volume of analytical waste should be avoided, and proper management of analytical waste should be provided. | 0.42  | 2      |
| 8. Multi-analyte or multi-parameter methods are preferred versus methods using one analyte at a time.                                | 0.68  | 2      |
| 9. The use of energy should be minimized.                                                                                            | 0.0   | 2      |
| 10. Reagents obtained from renewable sources should be preferred.                                                                    | 0.5   | 2      |
| 11. Toxic reagents should be eliminated or replaced.                                                                                 | 0.29  | 2      |
| 12. Operator's safety should be increased.                                                                                           | 0.6   | 2      |

# Analytical Greenness report sheet

20/11/2020 13:17:04

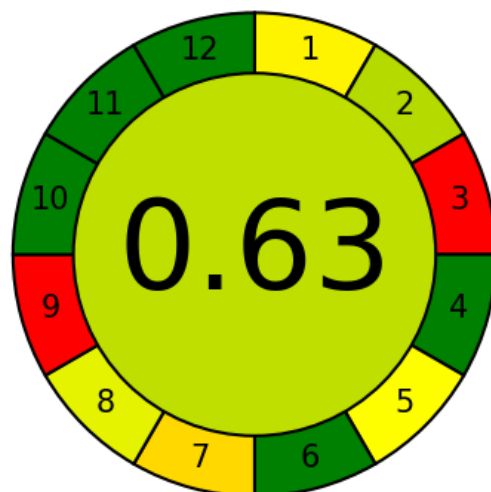

| Criteria                                                                                                                             | Score | Weight |
|--------------------------------------------------------------------------------------------------------------------------------------|-------|--------|
| 1. Direct analytical techniques should be applied to avoid sample treatment.                                                         | 0.48  | 2      |
| 2. Minimal sample size and minimal number of samples are goals.                                                                      | 0.65  | 2      |
| 3. If possible, measurements should be performed in situ.                                                                            | 0.0   | 2      |
| 4. Integration of analytical processes and operations saves energy and reduces the use of reagents.                                  | 1.0   | 2      |
| 5. Automated and miniaturized methods should be selected.                                                                            | 0.5   | 2      |
| 6. Derivatization should be avoided.                                                                                                 | 1.0   | 2      |
| 7. Generation of a large volume of analytical waste should be avoided, and proper management of analytical waste should be provided. | 0.42  | 2      |
| 8. Multi-analyte or multi-parameter methods are preferred versus methods using one analyte at a time.                                | 0.55  | 2      |
| 9. The use of energy should be minimized.                                                                                            | 0.0   | 2      |
| 10. Reagents obtained from renewable sources should be preferred.                                                                    | 1.0   | 2      |
| 11. Toxic reagents should be eliminated or replaced.                                                                                 | 1.0   | 2      |
| 12. Operator's safety should be increased.                                                                                           | 1.0   | 2      |

# Analytical Greenness report sheet

21/11/2020 12:59:21

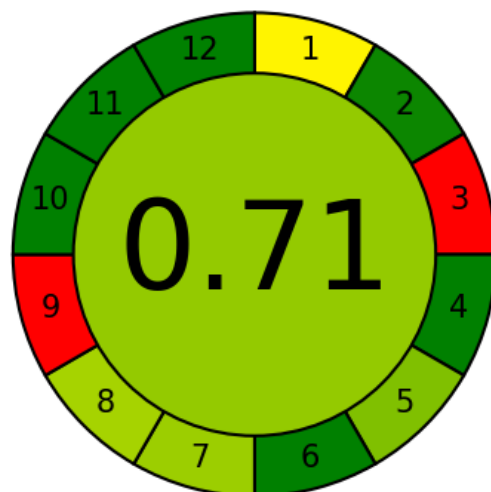

| Criteria                                                                                                                             | Score | Weight |
|--------------------------------------------------------------------------------------------------------------------------------------|-------|--------|
| 1. Direct analytical techniques should be applied to avoid sample treatment.                                                         | 0.48  | 2      |
| 2. Minimal sample size and minimal number of samples are goals.                                                                      | 0.98  | 2      |
| 3. If possible, measurements should be performed in situ.                                                                            | 0.0   | 2      |
| 4. Integration of analytical processes and operations saves energy and reduces the use of reagents.                                  | 1.0   | 2      |
| 5. Automated and miniaturized methods should be selected.                                                                            | 0.75  | 2      |
| 6. Derivatization should be avoided.                                                                                                 | 1.0   | 2      |
| 7. Generation of a large volume of analytical waste should be avoided, and proper management of analytical waste should be provided. | 0.69  | 2      |
| 8. Multi-analyte or multi-parameter methods are preferred versus methods using one analyte at a time.                                | 0.68  | 2      |
| 9. The use of energy should be minimized.                                                                                            | 0.0   | 2      |
| 10. Reagents obtained from renewable sources should be preferred.                                                                    | 1.0   | 2      |
| 11. Toxic reagents should be eliminated or replaced.                                                                                 | 1.0   | 2      |
| 12. Operator's safety should be increased.                                                                                           | 1.0   | 2      |

# Analytical Greenness report sheet

20/11/2020 13:26:34

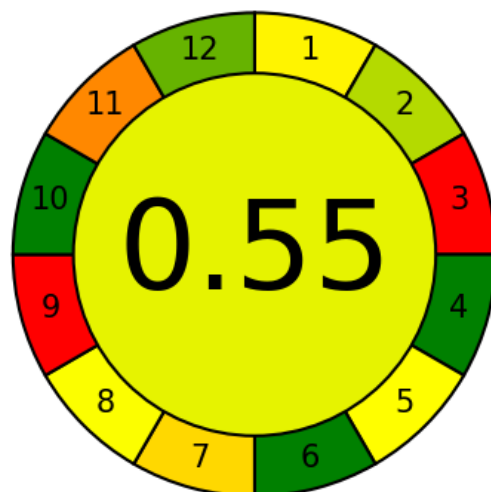

| Criteria                                                                                                                             | Score | Weight |
|--------------------------------------------------------------------------------------------------------------------------------------|-------|--------|
| 1. Direct analytical techniques should be applied to avoid sample treatment.                                                         | 0.48  | 2      |
| 2. Minimal sample size and minimal number of samples are goals.                                                                      | 0.65  | 2      |
| 3. If possible, measurements should be performed in situ.                                                                            | 0.0   | 2      |
| 4. Integration of analytical processes and operations saves energy and reduces the use of reagents.                                  | 1.0   | 2      |
| 5. Automated and miniaturized methods should be selected.                                                                            | 0.5   | 2      |
| 6. Derivatization should be avoided.                                                                                                 | 1.0   | 2      |
| 7. Generation of a large volume of analytical waste should be avoided, and proper management of analytical waste should be provided. | 0.42  | 2      |
| 8. Multi-analyte or multi-parameter methods are preferred versus methods using one analyte at a time.                                | 0.51  | 2      |
| 9. The use of energy should be minimized.                                                                                            | 0.0   | 2      |
| 10. Reagents obtained from renewable sources should be preferred.                                                                    | 1.0   | 2      |
| 11. Toxic reagents should be eliminated or replaced.                                                                                 | 0.27  | 2      |
| 12. Operator's safety should be increased.                                                                                           | 0.8   | 2      |

# Analytical Greenness report sheet

21/11/2020 13:37:23

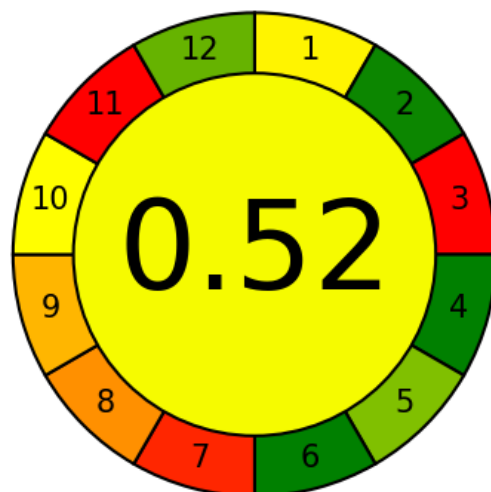

| Criteria                                                                                                                             | Score | Weight |
|--------------------------------------------------------------------------------------------------------------------------------------|-------|--------|
| 1. Direct analytical techniques should be applied to avoid sample treatment.                                                         | 0.48  | 2      |
| 2. Minimal sample size and minimal number of samples are goals.                                                                      | 0.98  | 2      |
| 3. If possible, measurements should be performed in situ.                                                                            | 0.0   | 2      |
| 4. Integration of analytical processes and operations saves energy and reduces the use of reagents.                                  | 1.0   | 2      |
| 5. Automated and miniaturized methods should be selected.                                                                            | 0.75  | 2      |
| 6. Derivatization should be avoided.                                                                                                 | 1.0   | 2      |
| 7. Generation of a large volume of analytical waste should be avoided, and proper management of analytical waste should be provided. | 0.08  | 2      |
| 8. Multi-analyte or multi-parameter methods are preferred versus methods using one analyte at a time.                                | 0.29  | 2      |
| 9. The use of energy should be minimized.                                                                                            | 0.36  | 2      |
| 10. Reagents obtained from renewable sources should be preferred.                                                                    | 0.5   | 2      |
| 11. Toxic reagents should be eliminated or replaced.                                                                                 | 0.0   | 2      |
| 12. Operator's safety should be increased.                                                                                           | 0.8   | 2      |

# Analytical Greenness report sheet

21/11/2020 13:40:24



| Criteria                                                                                                                             | Score | Weight |
|--------------------------------------------------------------------------------------------------------------------------------------|-------|--------|
| 1. Direct analytical techniques should be applied to avoid sample treatment.                                                         | 0.48  | 2      |
| 2. Minimal sample size and minimal number of samples are goals.                                                                      | 0.98  | 2      |
| 3. If possible, measurements should be performed in situ.                                                                            | 0.0   | 2      |
| 4. Integration of analytical processes and operations saves energy and reduces the use of reagents.                                  | 1.0   | 2      |
| 5. Automated and miniaturized methods should be selected.                                                                            | 0.75  | 2      |
| 6. Derivatization should be avoided.                                                                                                 | 1.0   | 2      |
| 7. Generation of a large volume of analytical waste should be avoided, and proper management of analytical waste should be provided. | 0.08  | 2      |
| 8. Multi-analyte or multi-parameter methods are preferred versus methods using one analyte at a time.                                | 0.29  | 2      |
| 9. The use of energy should be minimized.                                                                                            | 0.36  | 2      |
| 10. Reagents obtained from renewable sources should be preferred.                                                                    | 0.5   | 2      |
| 11. Toxic reagents should be eliminated or replaced.                                                                                 | 0.0   | 2      |
| 12. Operator's safety should be increased.                                                                                           | 0.8   | 2      |



# Analytical Greenness report sheet

20/11/2020 13:36:16

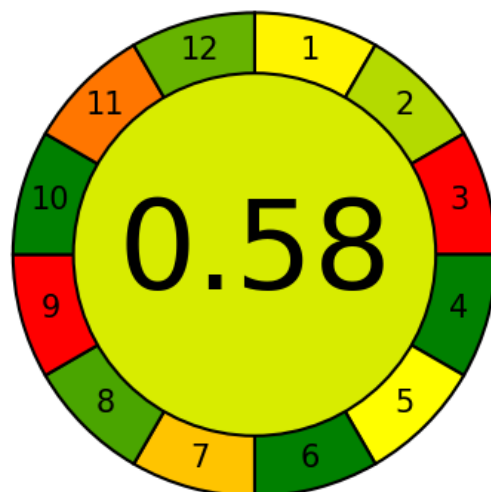

| Criteria                                                                                                                             | Score | Weight |
|--------------------------------------------------------------------------------------------------------------------------------------|-------|--------|
| 1. Direct analytical techniques should be applied to avoid sample treatment.                                                         | 0.48  | 2      |
| 2. Minimal sample size and minimal number of samples are goals.                                                                      | 0.65  | 2      |
| 3. If possible, measurements should be performed in situ.                                                                            | 0.0   | 2      |
| 4. Integration of analytical processes and operations saves energy and reduces the use of reagents.                                  | 1.0   | 2      |
| 5. Automated and miniaturized methods should be selected.                                                                            | 0.5   | 2      |
| 6. Derivatization should be avoided.                                                                                                 | 1.0   | 2      |
| 7. Generation of a large volume of analytical waste should be avoided, and proper management of analytical waste should be provided. | 0.39  | 2      |
| 8. Multi-analyte or multi-parameter methods are preferred versus methods using one analyte at a time.                                | 0.86  | 2      |
| 9. The use of energy should be minimized.                                                                                            | 0.0   | 2      |
| 10. Reagents obtained from renewable sources should be preferred.                                                                    | 1.0   | 2      |
| 11. Toxic reagents should be eliminated or replaced.                                                                                 | 0.23  | 2      |
| 12. Operator's safety should be increased.                                                                                           | 0.8   | 2      |
